# Supplementary material for: A silica nanoparticle supported fluorescence “turn-on” fluoride ion sensing system with tunable structure and sensitivity
Source: Royal Society of Chemistry journal article supplement (doi:10.1039/c5ra02158h), 2015-01-01
Supplement: c5ra02158h1.pdf [file c5ra02158h1.pdf]

## Electronic Supplementary Information

### A silica nanoparticle supported fluorescence ‘turn-on’ fluoride ion sensing system with tunable structure and sensitivity

Richard Appiah-Ntiamoah<sup>1</sup>, Jadhav H. Arvind<sup>1</sup>, John. Marc. C. Puguan<sup>1</sup>, Francis W.Y. Momade<sup>2</sup>,

Hern Kim<sup>1,\*</sup>

<sup>1</sup>*Department of Energy and Biotechnology, Energy and Environment Fusion Technology Center, Myongji University, Yongin, Kyonggi-do 449-728, Republic of Korea*

<sup>2</sup>*Department of Materials Engineering, Kwame Nkrumah University of Science and Technology (KNUST), Kumasi, Ghana*

\*Corresponding author: hernkim@mju.ac.kr, Tel: +82 31 330 6688; fax: +82 31 336 6336.

#### Table of contents:

|                                                                                                                                                                             |   |
|-----------------------------------------------------------------------------------------------------------------------------------------------------------------------------|---|
| Title of contents.....                                                                                                                                                      | 1 |
| <b>Fig. S1</b> Possible mechanism (fluoride-mediated cleavage of Si-O bond) for fluoride sensing by the sensor <b>B</b> .....                                               | 2 |
| <b>Fig. S2</b> (a) Absorption and (b) emission spectra of <b>SNP-TMSPEDA-FITC</b> , <b>SNP-TMSPEDA-FITC<sup>a</sup></b> , and <b>SNP-TMSPEDA-FITC + F<sup>-</sup></b> ..... | 3 |
| <b>Fig. S3</b> FT-IR spectra of <b>FITC<sup>a</sup></b> and <b>SNP-TMSPEDA-FITC-OSMDBT</b> .....                                                                            | 4 |

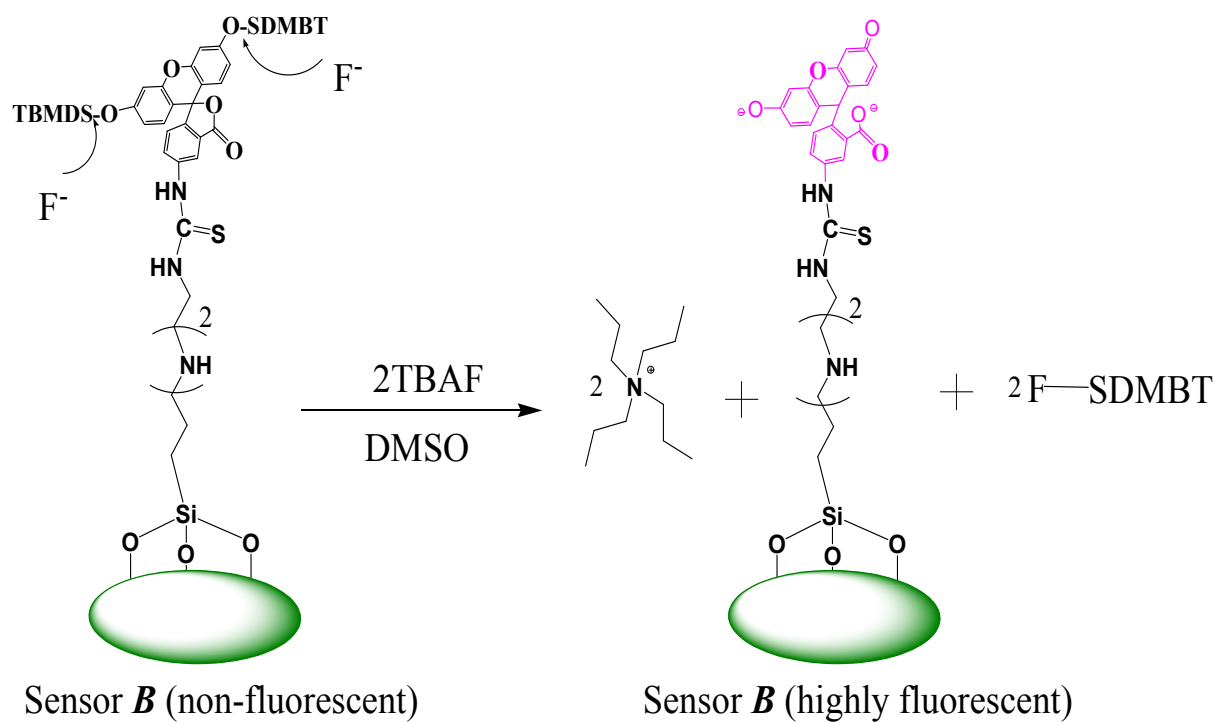

Fig. S1

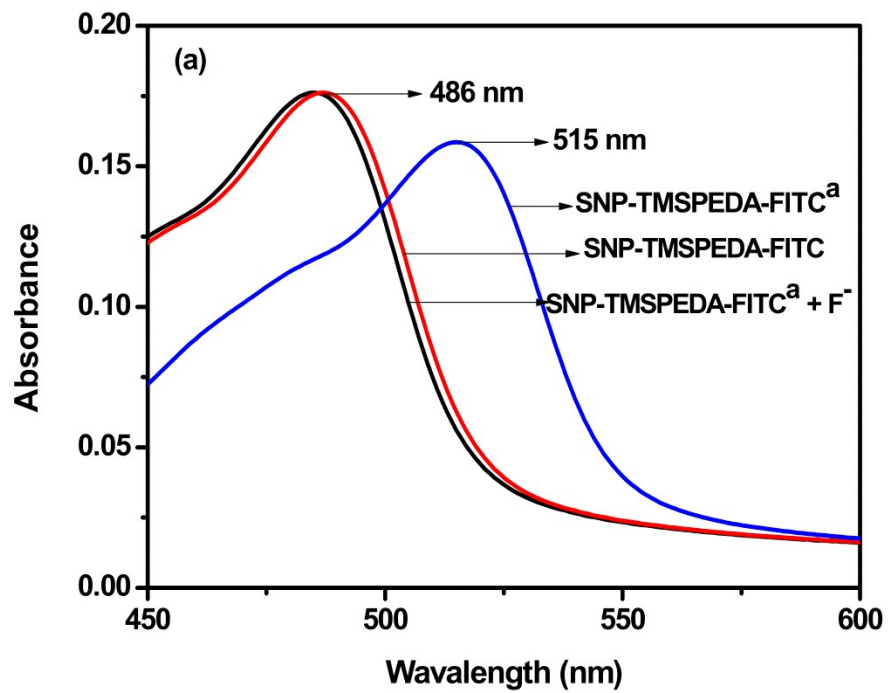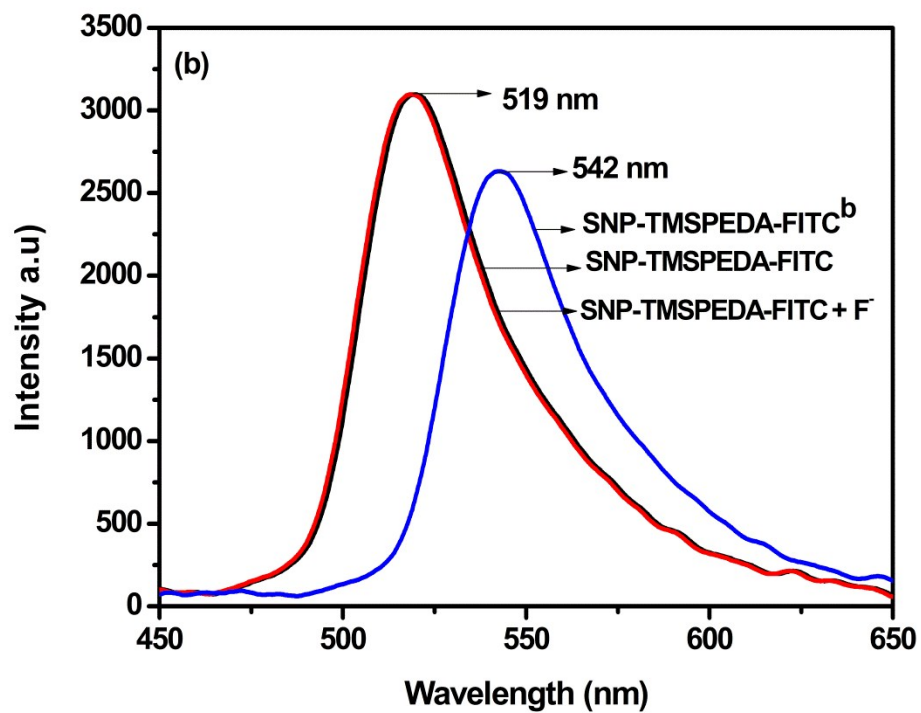

Fig. S2

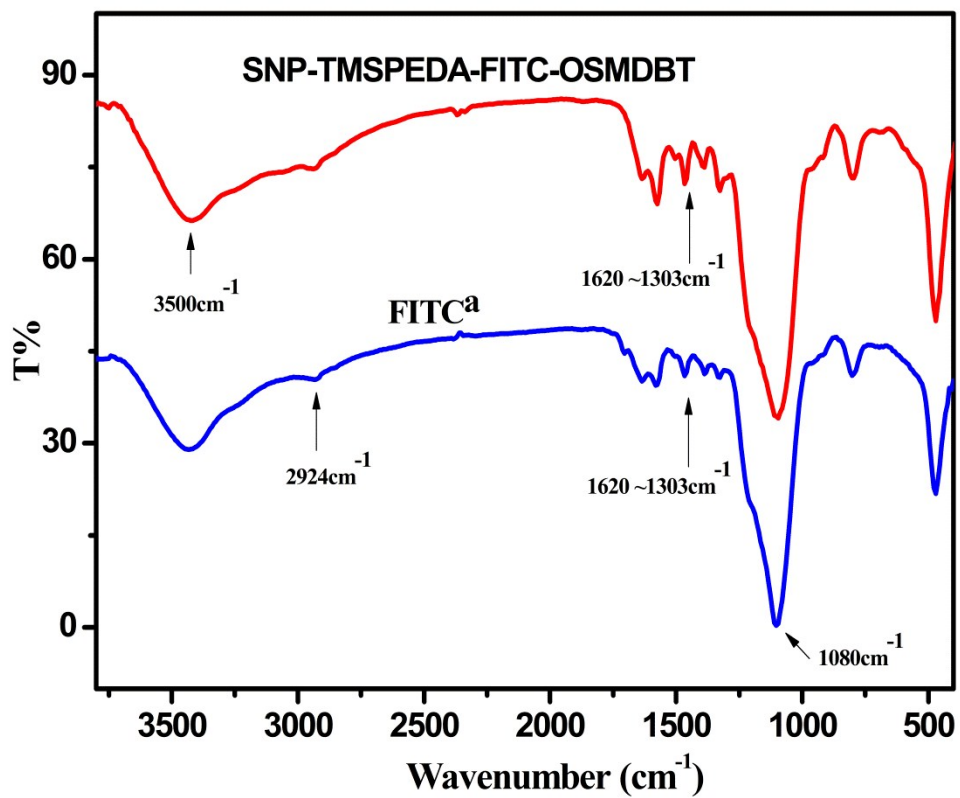

Fig. S3
